# Supplementary material for: Effectiveness of Multisensory Technologies Interventions on Cognitive Flexibility in the Elderly Population: A Systematic Review
Source: Research Square preprint supplement (doi:10.21203/rs.3.rs-6032364/v1), 2025-03-06
Supplement: Supplementary file 1 [file 68ff4232dffdc186fc897014.docx]

| **Outcome** | **Search term** |
| --- | --- |
| Cognitive Flexibility | "mental flexibility" OR “psychological flexibility” OR “executive function” OR “attention divided” OR "Set*Shifting" OR "Task*Switching" OR "dual*task" OR "multi*tasking" OR “Behaviour Rating Inventory of Executive Function” OR “Trail Making Test” OR “Stroop” OR “Wisconsin Card Sorting Test” OR “Verbal fluency” OR “Modified Five-Point Test” |
| Multisensory Technology | “Multisensory” OR “Multimodal” OR “Sensory Integration” OR “Sensor” OR "Virtual Reality" OR "Video 360" OR "Image 360" OR "Spherical Video" OR "Extended Reality" OR “Mixed Reality” OR “Augmented Reality” OR “Tele*” |
| *Note.* Title and Abstract were used as limiters on the search where possible (PubMed and Scopus). If not possible, just abstract was used (PsycInfo and Web of Science). The two search terms were joined by AND. | |

**Supplementary Table 1: Search Strategy**

**Supplementary Table 2: Detailed search strategy**

Outcome 1 – Cognitive Flexibility

|  | **Cognitive Flexibility** | **PubMed** | | **Web of science** | | **PsycINFO** | | **EMBASE** | | **CENTRAL** | | **IEEE Xplore** | **JMIR** |  |
| --- | --- | --- | --- | --- | --- | --- | --- | --- | --- | --- | --- | --- | --- | --- |
| 1 | Multisensory Technology | 0 | | 0 | | 0 | | 0 | | 0 | | 0 | 0 |  |
| 2 | Multisensory | 4 | | 7 | | 9 | | 5 | | 1 | | 0 | 2 |  |
| 3 | Multimodal | 41 | | 48 | | 32 | | 75 | | 18 | | 1 | 17 |  |
| 4 | Sensory Integration | 5 | | 7 | | 7 | | 5 | | 0 | | 0 | 2 |  |
| 5 | Virtual Reality | 31 | | 44 | | 30 | | 57 | | 23 | | 10 | 37 |  |
| 6 | Video 360 | 0 | | 0 | | 0 | | 0 | | 0 | | 0 | 0 |  |
| 7 | Image 360 | 1 | | 0 | | 0 | | 0 | | 0 | | 0 | 0 |  |
| 8 | Spherical Video | 0 | | 0 | | 0 | | 0 | | 0 | | 0 | 0 |  |
| 9 | Extended Reality | 0 | | 0 | | 0 | | 0 | | 0 | | 1 | 2 |  |
| 10 | Mixed Reality | 1 | | 1 | | 0 | | 1 | | 0 | | 0 | 5 |  |
| 11 | Augmented Reality | 1 | | 3 | | 2 | | 3 | | 1 | | 0 | 4 |  |
| 12 | Sensor | 2 | | 4 | | 1 | | 5 | | 4 | | 1 | 14 |  |
| 13 | Tele* | 55 | | 78 | | 20 | | 45 | | 1 | | 1 | 4 |  |
|  | Sub total | 141 | | 192 | | 101 | | 196 | | 48 | | 14 | 90 |  |
|  | Total |  | |  | |  | |  | |  | |  |  | 782 |
|  |  | |  | |  | |  | |  | |  | |  |  |

Outcome 1.2 – Mental Flexibility

|  | **Mental Flexibility** | **PubMed** | **Web of science** | **PsycINFO** | **EMBASE** | **CENTRAL** | **IEEE Xplore** | **JMIR** |  |
| --- | --- | --- | --- | --- | --- | --- | --- | --- | --- |
| 1 | Multisensory Technology | 0 | 0 | 0 | 0 | 0 | 0 | 0 |  |
| 2 | Multisensory | 1 | 1 | 1 | 1 | 1 | 0 | 2 |  |
| 3 | Multimodal | 6 | 5 | 4 | 9 | 5 | 0 | 2 |  |
| 4 | Sensory Integration | 0 | 1 | 0 | 0 | 1 | 0 | 0 |  |
| 5 | Virtual Reality | 3 | 7 | 7 | 12 | 4 | 2 | 12 |  |
| 6 | Video 360 | 0 | 0 | 0 | 0 | 0 | 0 | 0 |  |
| 7 | Image 360 | 1 | 0 | 0 | 0 | 0 | 0 | 0 |  |
| 8 | Spherical Video | 0 | 0 | 0 | 0 | 0 | 0 | 0 |  |
| 9 | Extended Reality | 0 | 0 | 0 | 0 | 0 | 0 | 0 |  |
| 10 | Mixed Reality | 0 | 0 | 0 | 0 | 0 | 0 | 1 |  |
| 11 | Augmented Reality | 0 | 0 | 0 | 0 | 0 | 0 | 2 |  |
| 12 | Sensor | 1 | 9 | 0 | 0 | 6 | 1 | 2 |  |
| 13 | Tele* | 6 | 2 | 3 | 2 | 0 | 0 | 4 |  |
|  | Sub total | 18 | 25 | 15 | 24 | 17 | 3 | 25 |  |
|  | Total |  |  |  |  |  |  |  | 127 |

Outcome 1.3 – Psychological Flexibility

|  | **Psychological Flexibility** | **PubMed** | **Web of science** | **PsycINFO** | **EMBASE** | **CENTRAL** | **IEEE Xplore** | **JMIR** |  |
| --- | --- | --- | --- | --- | --- | --- | --- | --- | --- |
| 1 | Multisensory Technology | 0 | 0 | 0 | 0 | 0 | 0 | 0 |  |
| 2 | Multisensory | 0 | 1 | 0 | 0 | 0 | 0 | 1 |  |
| 3 | Multimodal | 7 | 12 | 3 | 9 | 3 | 0 | 12 |  |
| 4 | Sensory Integration | 0 | 0 | 0 | 0 | 0 | 0 | 0 |  |
| 5 | Virtual Reality | 3 | 5 | 2 | 5 | 2 | 1 | 10 |  |
| 6 | Video 360 | 0 | 0 | 0 | 0 | 0 | 0 | 0 |  |
| 7 | Image 360 | 0 | 0 | 0 | 0 | 0 | 0 | 0 |  |
| 8 | Spherical Video | 0 | 0 | 0 | 0 | 0 | 0 | 0 |  |
| 9 | Extended Reality | 0 | 0 | 0 | 0 | 0 | 0 | 0 |  |
| 10 | Mixed Reality | 0 | 0 | 0 | 0 | 0 | 0 | 0 |  |
| 11 | Augmented Reality | 0 | 0 | 0 | 0 | 0 | 0 | 2 |  |
| 12 | Sensor | 0 | 0 | 0 | 0 | 1 | 0 | 10 |  |
| 13 | Tele* | 28 | 46 | 9 | 3 | 0 | 0 | 5 |  |
|  | Sub total | 38 | 64 | 14 | 17 | 6 | 1 | 40 |  |
|  | Total |  |  |  |  |  |  |  | 180 |

Outcome 1.4 – Executive function

|  | **Executive function** | **PubMed** | **Web of science** | **PsycINFO** | **EMBASE** | **CENTRAL** | **IEEE Xplore** | **JMIR** |  |
| --- | --- | --- | --- | --- | --- | --- | --- | --- | --- |
| 1 | Multisensory Technology | 0 | 0 | 0 | 1 | 0 | 0 | 0 |  |
| 2 | Multisensory | 36 | 0 | 40 | 12 | 15 | 2 | 19 |  |
| 3 | Multimodal | 339 | 87 | 224 | 97 | 139 | 17 | 63 |  |
| 4 | Sensory Integration | 25 | 35 | 53 | 37 | 7 | 1 | 4 |  |
| 5 | Virtual Reality | 230 | 50 | 207 | 55 | 163 | 79 | 137 |  |
| 6 | Video 360 | 0 | 0 | 0 | 0 | 0 | 0 | 0 |  |
| 7 | Image 360 | 12 | 0 | 0 | 0 | 0 | 0 | 0 |  |
| 8 | Spherical Video | 0 | 0 | 1 | 0 | 0 | 0 | 0 |  |
| 9 | Extended Reality | 0 | 3 | 0 | 0 | 0 | 3 | 5 |  |
| 10 | Mixed Reality | 0 | 5 | 0 | 6 | 1 | 3 | 14 |  |
| 11 | Augmented Reality | 8 | 19 | 7 | 26 | 5 | 15 | 27 |  |
| 12 | Sensor | 46 | 71 | 19 | 15 | 70 | 61 | 74 |  |
| 13 | Tele* | 327 | 419 | 274 | 30 | 25 | 46 | 18 |  |
|  | Sub total | 1015 | 689 | 825 | 279 | 425 | 225 | 361 |  |
|  | Total |  |  |  |  |  |  |  | 3819 |

Outcome 1.5 – Attention Divided

|  | **Attention Divided** | **PubMed** | **Web of science** | **PsycINFO** | **EMBASE** | **CENTRAL** | **IEEE Xplore** | **JMIR** |  |
| --- | --- | --- | --- | --- | --- | --- | --- | --- | --- |
| 1 | Multisensory Technology | 0 | 0 | 0 | 0 | 0 | 0 | 0 |  |
| 2 | Multisensory | 1 | 2 | 2 | 2 | 0 | 0 | 0 |  |
| 3 | Multimodal | 0 | 1 | 1 | 1 | 0 | 0 | 0 |  |
| 4 | Sensory Integration | 0 | 0 | 0 | 1 | 1 | 0 | 0 |  |
| 5 | Virtual Reality | 0 | 1 | 0 | 1 | 1 | 0 | 0 |  |
| 6 | Video 360 | 0 | 0 | 0 | 0 | 0 | 0 | 0 |  |
| 7 | Image 360 | 0 | 0 | 0 | 0 | 0 | 0 | 0 |  |
| 8 | Spherical Video | 0 | 0 | 0 | 0 | 0 | 0 | 0 |  |
| 9 | Extended Reality | 0 | 0 | 0 | 0 | 0 | 0 | 0 |  |
| 10 | Mixed Reality | 0 | 0 | 0 | 0 | 0 | 0 | 0 |  |
| 11 | Augmented Reality | 0 | 0 | 0 | 0 | 0 | 0 | 0 |  |
| 12 | Sensor | 0 | 0 | 0 | 0 | 2 | 0 | 0 |  |
| 13 | Tele* | 0 | 0 | 0 | 0 | 0 | 0 | 0 |  |
|  | Sub total | 1 | 4 | 3 | 5 | 4 | 0 | 0 |  |
|  | Total |  |  |  |  |  |  |  | 17 |

Outcome 1.6 – Set*Shifting

|  | **Set*Shifting** | **PubMed** | **Web of science** | **PsycINFO** | **EMBASE** | **CENTRAL** | **IEEE Xplore** | **JMIR** |  |
| --- | --- | --- | --- | --- | --- | --- | --- | --- | --- |
| 1 | Multisensory Technology | 0 | 0 | 0 | 0 | 0 | 0 | 0 |  |
| 2 | Multisensory | 3 | 3 | 1 | 58 | 1 | 0 | 1 |  |
| 3 | Multimodal | 11 | 14 | 6 | 22 | 0 | 0 | 1 |  |
| 4 | Sensory Integration | 1 | 1 | 1 | 7 | 0 | 0 | 0 |  |
| 5 | Virtual Reality | 2 | 3 | 0 | 20 | 2 | 0 | 5 |  |
| 6 | Video 360 | 0 | 0 | 0 | 0 | 0 | 0 | 0 |  |
| 7 | Image 360 | 0 | 0 | 0 | 0 | 0 | 0 | 0 |  |
| 8 | Spherical Video | 0 | 0 | 0 | 0 | 0 | 0 | 0 |  |
| 9 | Extended Reality | 0 | 0 | 0 | 2 | 0 | 0 | 0 |  |
| 10 | Mixed Reality | 0 | 0 | 0 | 5 | 0 | 0 | 0 |  |
| 11 | Augmented Reality | 0 | 0 | 0 | 22 | 0 | 0 | 1 |  |
| 12 | Sensor | 1 | 1 | 1 | 2 | 3 | 0 | 6 |  |
| 13 | Tele* | 11 | 12 | 1 | 6 | 0 | 0 | 1 |  |
|  | Sub total | 29 | 34 | 16 | 144 | 6 | 0 | 15 |  |
|  | Total |  |  |  |  |  |  |  | 244 |

Outcome 1.7 – Task*Switching

|  | **Task*Switching** | **PubMed** | **Web of science** | **PsycINFO** | **EMBASE** | **CENTRAL** | **IEEE Xplore** | **JMIR** |  |
| --- | --- | --- | --- | --- | --- | --- | --- | --- | --- |
| 1 | Multisensory Technology | 0 | 0 | 0 | 0 | 0 | 0 | 0 |  |
| 2 | Multisensory | 9 | 11 | 2 | 55 | 1 | 0 | 2 |  |
| 3 | Multimodal | 9 | 14 | 1 | 28 | 2 | 0 | 12 |  |
| 4 | Sensory Integration | 1 | 2 | 3 | 10 | 1 | 0 | 0 |  |
| 5 | Virtual Reality | 9 | 16 | 2 | 50 | 3 | 0 | 18 |  |
| 6 | Video 360 | 0 | 0 | 0 | 0 | 0 | 0 | 0 |  |
| 7 | Image 360 | 1 | 0 | 0 | 0 | 0 | 0 | 0 |  |
| 8 | Spherical Video | 0 | 0 | 0 | 0 | 0 | 0 | 0 |  |
| 9 | Extended Reality | 0 | 1 | 0 | 0 | 0 | 0 | 1 |  |
| 10 | Mixed Reality | 1 | 2 | 0 | 5 | 0 | 0 | 5 |  |
| 11 | Augmented Reality | 2 | 5 | 0 | 33 | 0 | 0 | 4 |  |
| 12 | Sensor | 3 | 19 | 0 | 6 | 3 | 0 | 8 |  |
| 13 | Tele* | 9 | 33 | 2 | 10 | 0 | 0 | 0 |  |
|  | Sub total | 43 | 103 | 10 | 197 | 10 | 0 | 50 |  |
|  | Total |  |  |  |  |  |  |  | 413 |

Outcome 1.8 – Dual*task

|  | **Dual*task** | **PubMed** | **Web of science** | **PsycINFO** | **EMBASE** | **CENTRAL** | **IEEE Xplore** | **JMIR** |  |
| --- | --- | --- | --- | --- | --- | --- | --- | --- | --- |
| 1 | Multisensory Technology | 0 | 0 | 0 | 1 | 0 | 0 | 0 |  |
| 2 | Multisensory | 47 | 1 | 9 | 41 | 9 | 0 | 12 |  |
| 3 | Multimodal | 75 | 2 | 15 | 67 | 52 | 0 | 24 |  |
| 4 | Sensory Integration | 22 | 36 | 7 | 20 | 6 | 0 | 3 |  |
| 5 | Virtual Reality | 146 | 0 | 31 | 39 | 91 | 0 | 68 |  |
| 6 | Video 360 | 0 | 0 | 0 | 0 | 0 | 0 | 0 |  |
| 7 | Image 360 | 3 | 0 | 0 | 0 | 0 | 0 | 0 |  |
| 8 | Spherical Video | 0 | 0 | 0 | 0 | 0 | 0 | 0 |  |
| 9 | Extended Reality | 1 | 0 | 0 | 0 | 0 | 0 | 1 |  |
| 10 | Mixed Reality | 2 | 0 | 0 | 1 | 0 | 0 | 8 |  |
| 11 | Augmented Reality | 19 | 0 | 4 | 15 | 10 | 0 | 16 |  |
| 12 | Sensor | 96 | 138 | 5 | 15 | 58 | 0 | 52 |  |
| 13 | Tele* | 61 | 153 | 9 | 25 | 8 | 0 | 9 |  |
|  | Sub total | 472 | 330 | 80 | 223 | 234 | 0 | 193 |  |
|  | Total |  |  |  |  |  |  |  | 1532 |

Outcome 1.9 – Multi*tasking

|  | **Multi*tasking** | **PubMed** | **Web of science** | **PsycINFO** | **EMBASE** | **CENTRAL** | **IEEE Xplore** | **JMIR** |  |
| --- | --- | --- | --- | --- | --- | --- | --- | --- | --- |
| 1 | Multisensory Technology | 0 | 0 | 0 | 0 | 0 | 0 | 0 |  |
| 2 | Multisensory | 2 | 18 | 17 | 9 | 2 | 7 | 1 |  |
| 3 | Multimodal | 6 | 114 | 36 | 36 | 1 | 148 | 1 |  |
| 4 | Sensory Integration | 0 | 2 | 7 | 3 | 0 | 0 | 0 |  |
| 5 | Virtual Reality | 6 | 92 | 59 | 60 | 3 | 41 | 4 |  |
| 6 | Video 360 | 0 | 0 | 0 | 0 | 0 | 0 | 0 |  |
| 7 | Image 360 | 0 | 0 | 0 | 0 | 0 | 0 | 0 |  |
| 8 | Spherical Video | 0 | 0 | 0 | 0 | 0 | 0 | 0 |  |
| 9 | Extended Reality | 0 | 1 | 0 | 0 | 0 | 0 | 1 |  |
| 10 | Mixed Reality | 0 | 9 | 0 | 1 | 0 | 6 | 0 |  |
| 11 | Augmented Reality | 1 | 31 | 8 | 5 | 0 | 24 | 2 |  |
| 12 | Sensor | 4 | 156 | 13 | 4 | 5 | 231 | 1 |  |
| 13 | Tele* | 13 | 384 | 35 | 50 | 0 | 205 | 0 |  |
|  | Sub total | 32 | 807 | 175 | 168 | 11 | 662 | 10 |  |
|  | Total |  |  |  |  |  |  |  | 1865 |

Outcome 1.10 – Behaviour Rating Inventory of Executive Function

|  | **Behaviour Rating Inventory of Executive Function** | **PubMed** | **Web of science** | **PsycINFO** | **EMBASE** | **CENTRAL** | **IEEE Xplore** | **JMIR** |  |
| --- | --- | --- | --- | --- | --- | --- | --- | --- | --- |
| 1 | Multisensory Technology | 0 | 0 | 0 | 0 | 0 | 0 | 0 |  |
| 2 | Multisensory | 0 | 0 | 0 | 0 | 0 | 0 | 0 |  |
| 3 | Multimodal | 5 | 0 | 0 | 0 | 1 | 0 | 0 |  |
| 4 | Sensory Integration | 1 | 0 | 0 | 0 | 0 | 0 | 0 |  |
| 5 | Virtual Reality | 6 | 2 | 2 | 2 | 3 | 0 | 1 |  |
| 6 | Video 360 | 0 | 0 | 0 | 0 | 0 | 0 | 0 |  |
| 7 | Image 360 | 0 | 0 | 0 | 0 | 0 | 0 | 0 |  |
| 8 | Spherical Video | 0 | 0 | 0 | 0 | 0 | 0 | 0 |  |
| 9 | Extended Reality | 0 | 0 | 0 | 0 | 0 | 0 | 0 |  |
| 10 | Mixed Reality | 0 | 0 | 0 | 0 | 0 | 0 | 0 |  |
| 11 | Augmented Reality | 0 | 0 | 0 | 0 | 0 | 0 | 0 |  |
| 12 | Sensor | 0 | 0 | 0 | 0 | 1 | 0 | 0 |  |
| 13 | Tele* | 19 | 1 | 0 | 0 | 3 | 0 | 1 |  |
|  | Sub total | 31 | 3 | 2 | 2 | 7 | 0 | 2 |  |
|  | Total |  |  |  |  |  |  |  | 47 |

Outcome 1.11 – Trail Making Test

|  | **Trail Making Test** | **PubMed** | **Web of science** | **PsycINFO** | **EMBASE** | **CENTRAL** | **IEEE Xplore** | **JMIR** |  |
| --- | --- | --- | --- | --- | --- | --- | --- | --- | --- |
| 1 | Multisensory Technology | 0 | 0 | 0 | 0 | 0 | 0 | 0 |  |
| 2 | Multisensory | 1 | 1 | 1 | 0 | 3 | 0 | 0 |  |
| 3 | Multimodal | 2 | 3 | 5 | 47 | 33 | 0 | 0 |  |
| 4 | Sensory Integration | 0 | 0 | 0 | 4 | 0 | 0 | 0 |  |
| 5 | Virtual Reality | 1 | 3 | 11 | 52 | 49 | 1 | 2 |  |
| 6 | Video 360 | 0 | 0 | 0 | 0 | 0 | 0 | 0 |  |
| 7 | Image 360 | 1 | 0 | 0 | 0 | 0 | 0 | 0 |  |
| 8 | Spherical Video | 0 | 0 | 0 | 0 | 0 | 0 | 0 |  |
| 9 | Extended Reality | 0 | 0 | 0 | 0 | 0 | 0 | 0 |  |
| 10 | Mixed Reality | 0 | 0 | 0 | 2 | 0 | 0 | 0 |  |
| 11 | Augmented Reality | 0 | 0 | 0 | 13 | 5 | 0 | 1 |  |
| 12 | Sensor | 0 | 0 | 1 | 1 | 22 | 0 | 1 |  |
| 13 | Tele* | 1 | 1 | 3 | 55 | 5 | 0 | 0 |  |
|  | Sub total | 6 | 8 | 21 | 174 | 114 | 1 | 4 |  |
|  | Total |  |  |  |  |  |  |  | 328 |

Outcome 1.12 – Stroop

|  | **Stroop** | **PubMed** | **Web of science** | **PsycINFO** | **EMBASE** | **CENTRAL** | **IEEE Xplore** | **JMIR** |  |
| --- | --- | --- | --- | --- | --- | --- | --- | --- | --- |
| 1 | Multisensory Technology | 0 | 0 | 0 | 0 | 0 | 0 | 0 |  |
| 2 | Multisensory | 25 | 43 | 42 | 38 | 2 | 3 | 8 |  |
| 3 | Multimodal | 58 | 88 | 134 | 120 | 35 | 20 | 23 |  |
| 4 | Sensory Integration | 2 | 6 | 30 | 8 | 2 | 0 | 3 |  |
| 5 | Virtual Reality | 69 | 131 | 110 | 100 | 57 | 35 | 41 |  |
| 6 | Video 360 | 0 | 0 | 0 | 0 | 0 | 0 | 0 |  |
| 7 | Image 360 | 3 | 0 | 0 | 0 | 0 | 0 | 0 |  |
| 8 | Spherical Video | 0 | 0 | 0 | 0 | 0 | 0 | 0 |  |
| 9 | Extended Reality | 0 | 0 | 0 | 0 | 0 | 2 | 1 |  |
| 10 | Mixed Reality | 2 | 1 | 2 | 0 | 1 | 1 | 6 |  |
| 11 | Augmented Reality | 3 | 6 | 1 | 2 | 5 | 4 | 7 |  |
| 12 | Sensor | 24 | 51 | 12 | 22 | 30 | 36 | 34 |  |
| 13 | Tele* | 59 | 105 | 97 | 60 | 6 | 24 | 3 |  |
|  | Sub total | 245 | 431 | 428 | 350 | 138 | 125 | 126 |  |
|  | Total |  |  |  |  |  |  |  | 1843 |

Outcome 1.13 – Wisconsin Card Sorting Test

|  | **Wisconsin Card Sorting Test** | **PubMed** | **Web of science** | **PsycINFO** | **EMBASE** | **CENTRAL** | **IEEE Xplore** | **JMIR** |  |
| --- | --- | --- | --- | --- | --- | --- | --- | --- | --- |
| 1 | Multisensory Technology | 0 | 0 | 0 | 0 | 0 | 0 | 0 |  |
| 2 | Multisensory | 0 | 0 | 4 | 0 | 1 | 0 | 2 |  |
| 3 | Multimodal | 10 | 10 | 63 | 33 | 4 | 1 | 5 |  |
| 4 | Sensory Integration | 2 | 4 | 10 | 6 | 0 | 0 | 0 |  |
| 5 | Virtual Reality | 10 | 13 | 43 | 24 | 6 | 6 | 8 |  |
| 6 | Video 360 | 0 | 0 | 0 | 0 | 0 | 0 | 0 |  |
| 7 | Image 360 | 1 | 0 | 0 | 0 | 0 | 0 | 0 |  |
| 8 | Spherical Video | 0 | 0 | 0 | 0 | 0 | 0 | 0 |  |
| 9 | Extended Reality | 0 | 0 | 0 | 0 | 0 | 0 | 1 |  |
| 10 | Mixed Reality | 0 | 0 | 0 | 0 | 0 | 0 | 4 |  |
| 11 | Augmented Reality | 0 | 0 | 1 | 0 | 0 | 1 | 3 |  |
| 12 | Sensor | 2 | 3 | 2 | 2 | 0 | 6 | 5 |  |
| 13 | Tele* | 6 | 10 | 40 | 33 | 1 | 1 | 1 |  |
|  | Sub total | 31 | 40 | 163 | 98 | 12 | 15 | 29 |  |
|  | Total |  |  |  |  |  |  |  | 388 |

Outcome 1.14 – Verbal Fluency

|  | **Verbal Fluency** | **PubMed** | **Web of science** | **PsycINFO** | **EMBASE** | **CENTRAL** | **IEEE Xplore** | **JMIR** |  |
| --- | --- | --- | --- | --- | --- | --- | --- | --- | --- |
| 1 | Multisensory Technology | 0 | 0 | 0 | 0 | 0 | 0 | 0 |  |
| 2 | Multisensory | 4 | 6 | 13 | 9 | 4 | 0 | 7 |  |
| 3 | Multimodal | 52 | 66 | 65 | 98 | 17 | 1 | 13 |  |
| 4 | Sensory Integration | 1 | 1 | 14 | 0 | 1 | 0 | 1 |  |
| 5 | Virtual Reality | 23 | 35 | 27 | 32 | 19 | 2 | 25 |  |
| 6 | Video 360 | 0 | 0 | 0 | 0 | 0 | 0 | 0 |  |
| 7 | Image 360 | 2 | 0 | 0 | 0 | 0 | 0 | 0 |  |
| 8 | Spherical Video | 0 | 0 | 0 | 0 | 0 | 0 | 0 |  |
| 9 | Extended Reality | 0 | 0 | 0 | 0 | 0 | 0 | 0 |  |
| 10 | Mixed Reality | 0 | 0 | 0 | 0 | 0 | 0 | 0 |  |
| 11 | Augmented Reality | 2 | 1 | 1 | 2 | 2 | 0 | 4 |  |
| 12 | Sensor | 5 | 8 | 5 | 5 | 5 | 3 | 21 |  |
| 13 | Tele* | 98 | 120 | 114 | 70 | 1 | 3 | 5 |  |
|  | Sub total | 187 | 237 | 239 | 216 | 49 | 9 | 76 |  |
|  | Total |  |  |  |  |  |  |  | 1013 |

Outcome 1.15 – Modified Five-Point Test

|  | **Modified Five-Point Test** | **PubMed** | **Web of science** | **PsycINFO** | **EMBASE** | **CENTRAL** | **IEEE Xplore** | **JMIR** |  |
| --- | --- | --- | --- | --- | --- | --- | --- | --- | --- |
| 1 | Multisensory Technology | 0 | 0 | 0 | 0 | 0 | 0 | 0 |  |
| 2 | Multisensory | 0 | 0 | 0 | 0 | 0 | 0 | 0 |  |
| 3 | Multimodal | 0 | 0 | 0 | 0 | 0 | 0 | 0 |  |
| 4 | Sensory Integration | 0 | 0 | 0 | 0 | 0 | 0 | 0 |  |
| 5 | Virtual Reality | 0 | 0 | 0 | 0 | 0 | 0 | 0 |  |
| 6 | Video 360 | 0 | 0 | 0 | 0 | 0 | 0 | 0 |  |
| 7 | Image 360 | 0 | 0 | 0 | 0 | 0 | 0 | 0 |  |
| 8 | Spherical Video | 0 | 0 | 0 | 0 | 0 | 0 | 0 |  |
| 9 | Extended Reality | 0 | 0 | 0 | 0 | 0 | 0 | 0 |  |
| 10 | Mixed Reality | 0 | 0 | 0 | 0 | 0 | 0 | 0 |  |
| 11 | Augmented Reality | 0 | 0 | 0 | 0 | 0 | 0 | 0 |  |
| 12 | Sensor | 0 | 0 | 0 | 0 | 0 | 0 | 0 |  |
| 13 | Tele* | 0 | 0 | 0 | 0 | 0 | 0 | 0 |  |
|  | Sub total | 0 | 0 | 0 | 0 | 0 | 0 | 0 |  |
|  | Total |  |  |  |  |  |  |  | 0 |

**Supplementary Table 3: Total database results**

|  | **PubMed** | **Web of science** | **PsycINFO** | **EMBASE** | **CENTRAL** | **IEEE Xplore** | **JMIR** |  |
| --- | --- | --- | --- | --- | --- | --- | --- | --- |
| Subtotal | 2289 | 2967 | 2092 | 2086 | 1081 | 1055 | 1021 | 12591 |
| Duplicates |  |  |  |  |  |  |  | 6756 |
| Total |  |  |  |  |  |  |  | 5835 |

**Supplementary Table 4: RITES scores**

| **Studies** | **1 - Participants characteristics** | **2 – Trial setting** | **3 – Flexibility of intervention(s)** | **4 – Clinical relevance of experimental and comparison intervention(s)** |
| --- | --- | --- | --- | --- |
| **Szczepocka et al., (2024)** | 4 | 3 | 4 | 3 |
| **Ferreira et al., (2022)** | 4 | 3 | 4 | 3 |
| **Cohavi & Levy-Tzedek, (2022)** | 4 | 3 | 3 | 3 |
| **Makmee & Wongupparaj (2022)** | 4 | 3 | 4 | 4 |
| **Plotnik et al., (2021)** | 4 | 3 | 3 | 3 |
| **Burin & Kawashima, (2021)** | 4 | 3 | 3 | 3 |
| **Li et al., (2020)** | 4 | 3 | 3 | 3 |
| **Lee et al., (2020)** | 3 | 3 | 3 | 4 |
| **Huang (2020)** | 3 | 3 | 3 | 4 |
| **Eggenberger et al., (2020)** | 4 | 3 | 3 | 4 |
| **Serino et al., (2017)** | 3 | 3 | 4 | 4 |
| **Bapka et al., (2017)** | 3 | 3 | 4 | 4 |
| **Eggenberger et al., (2015)** | 4 | 3 | 3 | 4 |
