# Supplementary material for: Effectiveness of Multisensory Technologies Interventions on Cognitive Flexibility in the Elderly Population: A Systematic Review
Source: Research Square preprint supplement (doi:10.21203/rs.3.rs-6032364/v1), 2025-03-06
Supplement: Supplementary file 2 [file b9e893adb3dfb3b6e41e7590.xlsx]

## Sheet: Sheet1 (2)
Study ID	Authors (years)	Sample Characteristics	Cognitive Health Status	Study design	Intervention Protocol	Comparator/Control	Multisensory technology	Technology Specifications	Sensory modalities involved	Cognitive Domains Targeted by the Technology	Tasks used in technology	Cognitive flexibility's measures	Main Cognitive Flexibility's outcomes	Pre-post measures	Cohen's d effect size	Main results
1	Szczepocka et al. (2024)	Total N = 72. EG (N = 35): Age 69.3 ± 2.84 years, Education 15.3 ± 2.6 years, 25 females. CG (N = 37): Age 71.3 ± 4.2 years, Education 15.8 ± 3.0 years, 29 females.	MoCA score ≥ 26	RCT, parallel-group	12-week VR-based cognitive training, 36 sessions total (3 sessions/week, 12 min each).	CG watched 360-degree nature videos with no cognitive tasks.	EG: IVR	EG: Pico Neo 3 Pro (motion tracking active).	EG: Sight, hearing, proprioception.	Cognitive flexibility, working memory, attention	EG: One-back task (participants must remember the color of the previous balloon and select the matching one), dual-N-back task (simultaneously track auditory and visual stimuli to match the balloon color two steps prior). CG: No active task, passive observation of nature videos.	Stroop Test, Shifting attention test	No significant improvement.	CNS Vital Signs	N/A	Visual memory and sustained attention improved in the EG
2	Ferreira et al. (2022)	Total N = 27. Age 72.0 ± 5.2 years, Education: 8.1 ± 5.3 years.	MMSE score > 27	RCT, within-group	30-minute sessions across three conditions (cycle ergometer, augmented reality exergames, no exercise). EG: Augmented Reality exergames using the Portable Exergame Platform for Elderly (PEPE). CG: Cycle ergometer with moderate-intensity exercise (50 rotations per minute).	CG (passive control): 30 minutes of rest without any exercise or AR, followed by cognitive testing.	EG: AR	EG: Exergames on the Pepe platform ( Kinect V2, projector on the floor)	EG: Sight, hearing, proprioception	Cognitive flexibility, attention, verbal fluency	EG: Exerpong (catching and moving objects by extending arms), Grape Stomping (stepping motions), Rabelos (rowing motion to collect items).	TMT, verbal fluency test	No significant improvement in cognitive flexibility across any of the three conditions (augmented reality, cycling, no exercise).	Deary-Liewald reaction time task, TMT, phonemic and semantic verbal fluency test	-0.24	No significant differences in cognitive outcomes across all three conditions. The findings suggest that a single session of augmented reality exergames or cycle ergometer exercise did not produce acute cognitive benefits in these domains for the participants.
5	Burin & Kawashima (2021)	Total N = 42, 1PP (Person Perspective) Group (N = 21): Age 71.71 ± 5.61 years, 14 females. 3PP Group (N = 21): Age 71.71 ± 5.81 years, 14 females.	Reported to be healthy and screened by phone for selection criteria.	RCT, 6-week intervention	Participants sat while observing a virtual body performing high-intensity intermittent exercise (vHIE) in either a 1PP or 3PP, alternating fast and slow walking every 2 minutes. The intervention was conducted twice a week for 6 weeks, with each session lasting 20 minutes.	3PP group acted as the control condition.	IVR	Oculus Rift VR	Sight, hearing, proprioception.	Executive functioning (specifically inhibition and cognitive control), prefrontal cortex activity.	vHIE in either a 1PP or 3PP	Stroop task	Significant reduction in Stroop task response times in the 1PP group post-intervention, associated with increased activation of the left dorsolateral prefrontal cortex (lDLPFC). No significant changes were observed in the 3PP group.	Stroop task, fNIRS	N/A	Repeated exposure to the full-body illusion in 1PP significantly improved cognitive flexibility and increased prefrontal cortex activity. The 3PP group did not show significant improvements.
13	Eggenberger et al. (2015)	Total N = 71. DANCE Group (N = 24): Age = 77.3 ± 6.3 years, 58.3% female. MEMORY Group (N = 22): Age = 78.5 ± 5.1 years, 72.7% female. PHYS Group (N = 25): Age = 80.8 ± 4.7 years, 64% female.	MMSE score > 22	RCT, 6-month intervention with a 1-year follow-up.	DANCE Group: VR video game dancing combined with strength and balance exercises, 1-hour session twice per week. MEMORY Group: Treadmill walking with simultaneous verbal memory training, combined with strength and balance exercises, 1-hour session twice per week. PHYS Group: Treadmill walking only, combined with strength and balance exercises, 1-hour session twice per week.	PHYS group	DANCE: non immersive VR	DANCE: Impact Dance Platforms, StepMania Software, using a non immersive VR	Sight, hearing, proprioception.	Executive functions, memory, attention	Dancing exergame	TMT, Executive Control Task	DANCE Group showed significant improvement in cognitive flexibility and executive function compared to the PHYS group.	TMT, Executive Control Task, Paired-Associates Learning task, WMS-R, DSST, WAIS-R, HRV, physical performance parameters	N/A	Cognitive flexibility improved significantly in the DANCE group, while memory performance improved in both DANCE and MEMORY groups. PHYS group showed no significant changes in cognitive outcomes.
9	Eggenberger et al. (2020)	Total N = 70. DANCE Group (N = 24): Age = 77.3 ± 6.3 years, 58.3% female. MEMORY Group (N = 22): Age = 78.5 ± 5.1 years, 72.7% female. PHYS Group (N = 24): Age = 80.7 ± 4.8 years, 62.5% female.	Reported to be healthy. MMSE (mean score = 28.4 ± 1.4).	RCT, 6-month intervention	DANCE Group: VR video game dancing for 20 minutes, strength and balance exercises (20 minutes each), twice weekly for 6 months. MEMORY Group: Treadmill walking with simultaneous verbal memory training (20 minutes), along with strength and balance exercises, twice weekly for 6 months. PHYS Group (control): Treadmill walking only (20 minutes), along with strength and balance exercises, twice weekly…	PHYS group	DANCE: non immersive VR	DANCE: Impact Dance Platforms, StepMania Software, using a non immersive VR	Sight, hearing, proprioception.	Executive functions, memory, attention	Dancing exergame	TMT, Executive Control Task	Significant improvement in cognitive flexibility (TMT-B) and executive function in the DANCE group compared to MEMORY and PHYS groups.	TMT, Executive Control Task, Paired-Associates Learning task, WMS-R, DSST, WAIS-R, HRV, physical performance parameters	N/A	The DANCE group showed significant improvements in cognitive flexibility (TMT-B), executive function (Executive Control Task), working memory (WMS-R), associative learning (Paired-Associates), processing speed (DSST), HRV indices, and physical performance. The MEMORY group showed modest improvement in verbal memory. The PHYS group had no significant changes.
3	Cohavi & Levy-Tzedek (2022)	Total N = 64. EG: 32 older adults (age 69.6 ± 5.7 years, 16 females), 32 younger adults (age 25.8 ± 3.2 years, 16 females).	Reported to be healthy, MMSE (average score = 28.2 ± 1.7)	Within-subject, non-randomized design	Short-term cognitive training. Both groups completed N-back and Task-Switching tasks by interacting with 2 systems: IVR and a social robot. Each provided the same tasks but with different means (spatial presence in the IVR and social presence in the robot). The task provided three levels of difficulty based on performance, with 20 stimuli per stage.	Both VR and social robot platforms acted as comparators within a within-group design. Participants alternated between the two platforms, starting with one and switching to the other after a 3-minute break.	EG: IVR.	EG: HTC Vive Pro (hand tracking active)	EG: Sight, hearing, proprioception	Working memory (N-back task), cognitive flexibility (Task-Switching task)	EG: N-back and Task-Switching tasks embedded in realistic VR settings (e.g., urban driving, underwater exploration).	Task-Switching task	No significant differences in cognitive flexibility performance between the VR and robot conditions (Task-Switching task)	N-back and Task Switching	-0.92	Participants performed similarly on both platforms, but 66% preferred the VR for short-term cognitive training due to its immersive experience, while preferences were split evenly between VR and the social robot for long-term training.
10	Makmee & Wongupparaj (2022)	Total N = 60. 63% female. VR Group (N= 30): Age = 64.43 ± 2.79 years. CG (N=30): Age = 67.30 ± 4.86 years.	Reported to be healthy. MMSE.	Randomized, pretest-posttest control group design. One month with pre-post assessment	VR Group: Patients underwent VR-based cognitive training to improve executive functions. The sessions lasted about 60 minutes, twice a week. CG: Patients patients did not receive any intervention.	Passive control	VR Group: IVR.	Oculus Quest	Sight, hearing, proprioception.	Executive function, visuospatial working memory, visuomotor adaptation	Grasping objects in a precise order, categorizing them, placing them back in their initial position	Berg’s Card Sorting Test (BCST)	VR group showed a significant increase in the percentage of correct responses in the post-test compared with the CG. However, there were no significant differences between the two groups in the other subscales.	Go/noGo, Forward/backward digit span, and BCST	0.78	The VR-based intervention significantly improved EF (inhibitory, updating, shifting) of older adults in the VR group. The results indicated that simultaneous combined cognitive-motor control as incorporated in the VR-based intervention is safe and effective in improving EF in older adults without cognitive impairment.
6	Li et al. (2020)	Total N = 20. EG (N = 10): Age 73.8 ± 7.35 years, Education 11.8 ± 1.93 years, 7 females. CG (N = 10): Age 72.4 ± 7.75 years, Education 11.1 ± 1.45 years, 6 females.	MMSE score > 24	Mixed-methods, non-randomized design, 4-week intervention	EG played a multitasking VR motion video game (Whac-A-Mole) three times per week, each session lasting 45 minutes. CG received no intervention.	CG (passive control): no exercise, followed by cognitive testing.	IVR	HTC Vive Pro, hand and ankle sensors	Sight, hearing, proprioception.	Working memory, attention, reasoning	Multitasking game involving animal-feeding tasks based on shapes and colors, requiring both cognitive and physical responses.	Multitasking paradigm into VR game	EG showed improvement in multitasking performance, as indicated by better accuracy and quicker responses in switching between cognitive and physical tasks during gameplay.	Player Experience, n-back task, ANT, SPM, PANAS, IMI, PENS and one-leg balance test	N/A	Significant improvements in working memory (2-back trials), reasoning (SPM), and physical balance (open-eyes one-leg balance test) in the EG. No significant changes were observed in the CG.
7	Lee et al. (2020)	Total N = 20. MCI (N = 10): Age = 63.3 ± 2.7 years, 7 females. HC (N = 10): Age = 64.7 ± 3.2 years, 6 females.	HC: MoCA score: ≥ 26	Pilot study, mixed-methods, non-randomized design; pre- and post-assessments over three 2-hour training sessions within two weeks.	Audiovisual integrative (AV) training using a PlayStation 4 rhythm game ("Taiko no Tatsujin"). The training involved hitting a Taiko drum based on visual and auditory cues. Each session lasted 2 hours	HC	Non-immersive VR	Simulated electronic Taiko drum, PlayStation 4 gaming system, rhythm-based gameplay.	Sight, hearing, proprioception.	Attention, executive functions	Match visual and auditory cues by striking the drum with each hand according to the cues’ location (center or rim of the drum).	Stroop Test	No significant improvement was observed in the HC.	Stroop test and Purdue Pegboard test	N/A	The MCI showed significant improvements in attentional control and non-dominant hand motor function, while the HC showed no significant changes.
8	Huang (2020)	Total N = 33. IVRG (N = 16): Age = 61.93 ± 8.21 years, 12 females. Non-Immersive Group (N = 17): Age = 61.93 ± 8.21 years, 12 females.	Reported to be healthy.	Non-randomized, between-subjects design, 4-week intervention	Participants played the exergame "Fruit Ninja" for 20 minutes per session, twice per week, for 4 weeks. The IVRG used a VR headset, while the non-immersive group used a 27-inch monitor with motion-tracking Kinect.	Non immersive group	IVRG: IVR. Non-Immersive Group: monitor and Kinect	IVRG: Oculus Rift, motion-tracking sensors. Non-Immersive Group: 27-inch LCD monitor, Kinect for motion tracking.	Sight, hearing, proprioception.	Executive functions, specifically inhibitory control, task switching, and working memory.	Fruit Ninja	TMT, Stroop Test	Significant improvement in task switching and inhibitory control in the IVRG. No significant improvement in the non-immersive group.	Stroop Test, TMT, Digit Span	0.52	The IVRG showed significant improvements in both inhibitory control and task switching. No significant improvement was observed in working memory. The non-immersive group showed no significant changes across all cognitive domains.
11	Serino et al. (2017)	Total N = 28. VR Group-AD (N = 10): Age = 86.6 ± 6.13 years, 9 females. CG-AD (N = 10): Age = 88.7 ± 3.59 years, 8 females. VR Group-Normal Aging (N = 8): Age = 86.62 ± 6.19 years, 4 females.	VR Group-Normal Aging: Milan Overall Dementia Scale score > 85.5	Development-of-concept trial, randomized, between-subjects design. 10 VR-based sessions over 3–4 weeks	VR Group: Patients underwent VR-based cognitive training for mental frame syncing, navigating a virtual city to locate objects, with encoding and retrieval phases. Sessions lasted ~20 minutes, three times per week. CG: Patients engaged in traditional cognitive rehabilitation activities, such as card games and music listening.	Traditional cognitive rehabilitation	Non-immersive VR (desktop-based)	Desktop VR system, gamepad	Sight, hearing, proprioception.	Spatial memory, executive function, attention	Encoding and retrieval of object locations in a virtual city, navigating different parts of the city to find and memorize objects.	FAB, Verbal Fluency Test	The VR Group-Normal Aging achieved significant improvements in cognitive flexibility, as measured by the Alternate Verbal Fluency Test (p = 0.025), but not on the FAB.	Milan Overall Dementia Scale, Corsi Block Test, Verbal Fluency Test, Attentional Matrices, FAB.	1.29	VR-based training led to significant improvements in long-term spatial memory for AD patients and executive function for cognitively healthy older adults compared to traditional cognitive rehabilitation.
12	Bapka et al. (2017)	Total N = 19. Video Game Group (N = 9): Age = 71.33 ± 4.60 years, 5 females. VR Group (N = 10): Age = 70.3 ± 5.03 years, 4 females.	MMSE score > 27	Randomized, pretest-posttest, between-subjects design. 6-week intervention.	Video Game Group: Trained with the Super Mario Kart video game (Nintendo Wii) for 18 sessions, 40 minutes each, over 6 weeks. VR Group: Trained using the FitForAll VR platform, adapted for executive function training, with 18 sessions of 40 minutes each over 6 weeks. Tasks focused on attention, inhibition, and task switching.	Video Game Group	VR Group: Semi-immersive VR platform (FitForAll with Kinect sensor)	Desktop VR system, Kinect	Sight, hearing, proprioception.	Executive functions (inhibitory control, task switching, planning)	VR Group: Four tasks—apple collection, fish collection, golf simulation, and Break Blocks..	D-KEFS Design Fluency Test (initiation, task switching) and Tower Test (planning)	VR Group showed significant improvement in cognitive flexibility and planning from pre-training to follow-up.	D-KEFS Design Fluency Test and Tower Test	N/A	The VR group demonstrated sustained improvement in executive functions (cognitive flexibility, planning), while the video game group showed modest gains that were not maintained at follow-up.
